# Supplementary material for: Tryptophan and Kynurenine Enhances the Stemness and Osteogenic Differentiation of Bone Marrow-Derived Mesenchymal Stromal Cells In Vitro and In Vivo
Source: PubMed Central journal article supplement (PMC7796421; doi:10.3390/ma14010208), 2021-01-04
Supplement: materials-14-00208-s001.pdf [file materials-14-00208-s001.pdf]

Supplementary Material

# Tryptophan and Kynurenine Enhances the Stemness and Osteogenic Differentiation of Bone Marrow-Derived Mesenchymal Stromal Cells In Vitro and In Vivo

Hai Thanh Pham <sup>1,4</sup>, Mitsuaki Ono <sup>2,\*</sup>, Emilio Satoshi Hara <sup>3,\*</sup>, Ha Thi Thu Nguyen <sup>1,2,4</sup>, Anh Tuan Dang <sup>1,2,4</sup>, Hang Thuy Do <sup>1,2,4</sup>, Taishi Komori <sup>1</sup>, Ikue Tosa <sup>1</sup>, Yuri Hazehara-Kunitomo <sup>1,2</sup>, Yuya Yoshioka <sup>1</sup>, Yasutaka Oida <sup>1</sup>, Kentaro Akiyama <sup>1</sup> and Takuo Kuboki <sup>1</sup>

- <sup>1</sup> Department of Oral Rehabilitation and Regenerative Medicine, Dentistry and Pharmaceutical Sciences, Okayama University Graduate School of Medicine, Okayama 700-8558, Japan; pth\_uytki@yahoo.com (H.T.P.); thuharhm@gmail.com (H.T.T.N.); ppjj5xuj@s.okayama-u.ac.jp (A.T.D.); pa62884x@s.okayama-u.ac.jp (H.T.D.); de19016@s.okayama-u.ac.jp (T.K.); de421035@s.okayama-u.ac.jp (I.T.); de19034@s.okayama-u.ac.jp (Y.H.-K.); de17054@s.okayama-u.ac.jp (Y.Y.); gmd20103@s.okayama-u.ac.jp (Y.O.); akentaro@md.okayama-u.ac.jp (K.A.); kuboki@md.okayama-u.ac.jp (T.K.)
- <sup>2</sup> Department of Molecular Biology and Biochemistry, Dentistry and Pharmaceutical Sciences, Okayama University Graduate School of Medicine, Okayama 700-8558, Japan
- <sup>3</sup> Department of Biomaterials, Dentistry and Pharmaceutical Sciences, Okayama University Graduate School of Medicine, Okayama 700-8558, Japan
- <sup>4</sup> Faculty of Dentistry, Hai Phong University of Medical and Pharmacy, Haiphong 04211, Vietnam
- \* Correspondence: mitsuaki@md.okayama-u.ac.jp (M.O.); gmd421209@s.okayama-u.ac.jp (E.S.H.); Tel.: +81-86-235-7127 (M.O.); +81-86-235-6667 (E.S.H.); Fax: +81-86-222-7768 (M.O.); +81-86-235-6669 (E.S.H.)
- \* Correspondence: mitsuaki@md.okayama-u.ac.jp (M.O.); gmd421209@s.okayama-u.ac.jp (E.S.H.); Tel.: +81-86-235-7128 (M.O.); Tel.: +81-86-235-6667 (E.S.H.); Fax: +81-86-222-7768 (M.O.); Fax: +81-86-235-6669 (E.S.H.)

**Citation:** Pham, H.T.; Ono, M.; Hara, E.S.; Nguyen, H.T.T.; Dang, A.T.; Do, H.T.; Komori, T.; Tosa, I.; Hazehara-Kunitomo, Y.; Yoshioka, Y.; et al. Tryptophan and Kynurenine enhances the stemness and osteogenic differentiation of bone marrow-derived mesenchymal stromal cells in vitro and in vivo. *Materials* **2020**, *14*, x. <https://doi.org/10.3390/xxxxx>

Received: 1 December 2020

Accepted: 21 December 2020

Published: date

**Publisher's Note:** MDPI stays neutral with regard to jurisdictional claims in published maps and institutional affiliations.

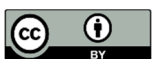

**Copyright:** © 2020 by the authors. Licensee MDPI, Basel, Switzerland. This article is an open access article distributed under the terms and conditions of the Creative Commons Attribution (CC BY) license (<http://creativecommons.org/licenses/by/4.0/>).

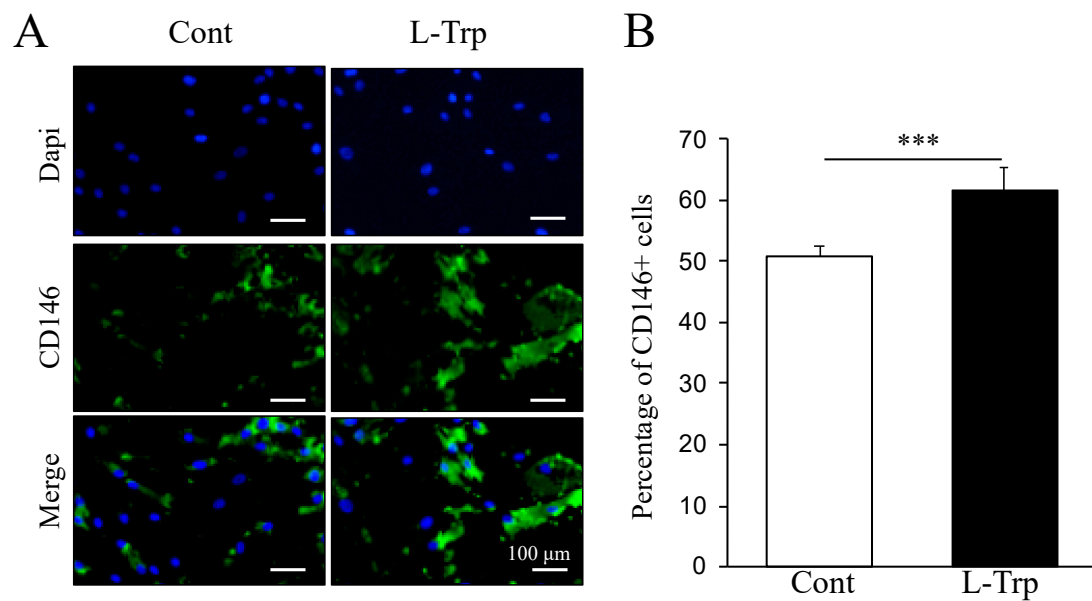

**Figure S1.** Effect of L-Tryptophan on the stem cell phenotype of hBMSCs. Cells were treated with L-Trp for two days, and then the expression of CD146 was analyzed in the cells. A higher number of CD146<sup>+</sup> cells was observed in the L-Trp-treated hBMSCs, as shown by the fluorescence images (A) and quantitative analysis (B). DAPI = blue. CD146 = green. Data represent the mean  $\pm$  SD (n = 3). \*\*\*  $p < 0.001$ , unpaired  $t$ -test.

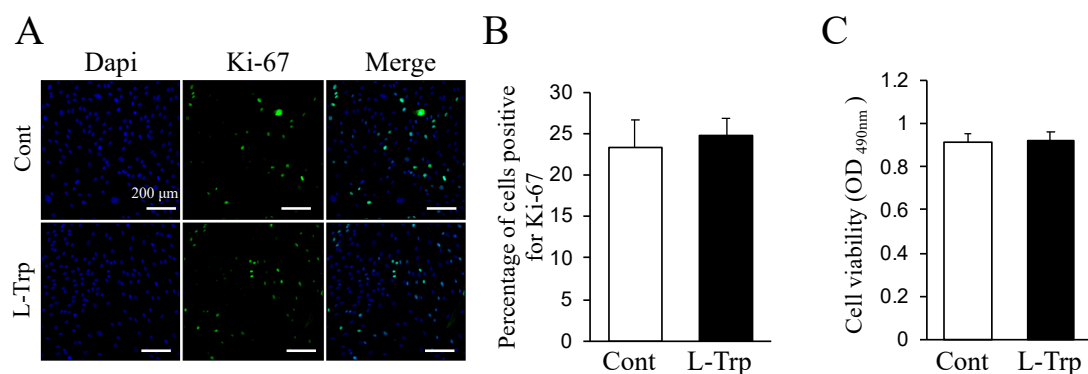

**Figure S2.** Effect of L-Tryptophan on cell cycle and cell viability. (A) No change in the expression of the cell proliferation marker Ki-67 was detected after the treatment of L-Trp. DAPI and Ki-67 are shown in green and blue, respectively. Images and graph are representatives of at least 3 independent experiments. (B) L-Trp did not affect cell viability performed by MTS assay. Graph is representative of at least 3 independent experiments.

**Table S1.** List of D-isomer amino acids included in the orphan ligand library that was used in the screening.

| ORPHAN LIGANDS |           |                     |       |              |                            |
|----------------|-----------|---------------------|-------|--------------|----------------------------|
| #              | CAS #     | Name                | M.W.  | Conc. (mMOL) | Rationale                  |
| 1              | 1783-96-6 | D-Aspartic acid     | 133.1 | 10           | Putative endogenous ligand |
| 2              | 6893-26-1 | D-Glutamic acid     | 147.1 | 10           | Putative endogenous ligand |
| 3              | 312-84-5  | D-Serine            | 105.1 | 10           | Putative endogenous ligand |
| 4              | 338-69-2  | D-Alanine           | 89.1  | 10           | D-Amino acid               |
| 5              | 6729-55-1 | g-D-Glutamylglycine | 204.2 | 10           | Putative endogenous ligand |
| 6              | 157-06-2  | D-Arginine          | 174.2 | 10           | D-Amino acid               |
| 7              | 5794-24-1 | D-Asparagine        | 150.1 | 10           | D-Amino acid               |

|    |            |                     |       |    |              |
|----|------------|---------------------|-------|----|--------------|
| 8  | 921-01-7   | D-Cysteine          | 121.1 | 10 | D-Amino acid |
| 9  | 5959-95-5  | D-Glutamine         | 146.1 | 10 | D-Amino acid |
| 10 | 351-50-8   | D-Histidine         | 155.2 | 10 | D-Amino acid |
| 11 | 319-78-8   | D-Isoleucine        | 131.2 | 10 | D-Amino acid |
| 12 | 328-38-1   | D-Leucine           | 131.2 | 10 | D-Amino acid |
| 13 | 923-27-3   | D-Lysine            | 146.2 | 10 | D-Amino acid |
| 14 | 348-67-4   | D-Methionine        | 149.2 | 10 | D-Amino acid |
| 15 | 16682-12-5 | D-Ornithine         | 168.6 | 10 | D-Amino acid |
| 16 | 673-06-3   | D-Phenylalanine     | 165.2 | 10 | D-Amino acid |
| 17 | 344-25-2   | D-Proline           | 115.1 | 10 | D-Amino acid |
| 18 | 4042-36-8  | D-Pyroglutamic acid | 129.1 | 10 | D-Amino acid |
| 19 | 632-20-2   | D-Threonine         | 119.1 | 10 | D-Amino acid |
| 20 | 153-94-6   | D-Tryptophan        | 204.2 | 10 | D-Amino acid |
| 21 | 556-02-5   | D-Tyrosine          | 181.2 | 10 | D-Amino acid |
| 22 | 640-68-6   | D-Valine            | 117.1 | 10 | D-Amino acid |

**Table S2.** List of primer sequences used for quantitative analysis of gene expression levels by real-time RT-PCR.

| Gene          | Species | Gene Bank Accession no. | Primer Sequence                                                         | PCR Product Length (bp) |
|---------------|---------|-------------------------|-------------------------------------------------------------------------|-------------------------|
| S29           | Human   | BC032813                | 5'-TCTCGCTCTTGTCTGTCTGTTC-3'(S)<br>5'-ACACTGGCGGCACATATTGAGG-3'(AS)     | 75                      |
| OCT-4         | Human   | NM_001159542            | 5'-CCGAGTGTGGTTCTGTAAC-3'(S)<br>5'-GAAAGGGACCGAGGAGTA-3'(AS)            | 196                     |
| NANO G        | Human   | NM_024865               | 5'-TCTCCAACATCCTGAACCT-3'(S)<br>5'-GCGTCACACCATTGCTAT-3'(AS)            | 117                     |
| SOX-2         | Human   | NM_003106               | 5'-GCACAACCTCGGAGATCAG-3'(S)<br>5'-GCGTGTACTTATCCTTCTTCAT-3'(AS)        | 182                     |
| OPN           | Human   | BC007016                | 5'-CTGTGTTGGTGGAGGATGTCTGC-3'(S)<br>5'-GTCGGCGTTGGCTGAGAAGG-3'(AS)      | 89                      |
| OCN           | Human   | NM_199173               | 5'-CAGAGTCCAGCAAAGGTG-3'(S)<br>5'-AGCCATTGATACAGGTAGC-3'(AS)            | 88                      |
| LPL           | Human   | BT006726                | 5'-CCGCCGCCGACCAAAGAAG-3'(S)<br>5'-GAAATGACAGGTAGCCACGGACTC-3'(AS)      | 131                     |
| PPAR $\gamma$ | Human   | BT007281                | 5'-CTGTCGGTTTCAGAAATGCCTTGC-3'(S)<br>5'-GGAGGTCAGCGGACTCTGGATTCT-3'(AS) | 143                     |
| Oct-4         | Mouse   | NM_013633               | 5'-GCATTGAGAACCGTGTGA-3'(S)<br>5'-GATTGGCGATGTGAGTGAT-3'(AS)            | 81                      |
| Sox2          | Mouse   | NM_011443               | 5'-CTCGCAGACCTACATGAAC-3'(S)<br>5'-CTCGGACTTGACCACAGA-3'(AS)            | 106                     |
| Nanog         | Mouse   | NM_028016               | 5'-TTGGTGTGTTAGTGTATTTGTC-3'(S)<br>5'-TGGGAAGGAGAGATATATGC-3'(AS)       | 101                     |
| Opn           | Mouse   | AF515708                | 5'-GAATGCTGTGTCCTCTGAAG-3'(S)<br>5'-CGTCATCATCATCGTCATCAT-3'(AS)        | 110                     |
| Ocn           | Mouse   | BC055868                | 5'-CCAAGCAGGAGGGCAATAAGGTAG-3'(S)<br>5'-CTCGTCACAAGCAGGGTCAAGC-3'(AS)   | 122                     |
| Ppar $\gamma$ | Mouse   | NM_01116                | 5'-GCCAAGGTGCTCCAGAAGATGAC-3'(S)                                        | 155                     |

---

|            |       |           |                                                                                   |     |
|------------|-------|-----------|-----------------------------------------------------------------------------------|-----|
|            |       |           | 5'-CGGGTGGGACTTTCCTGCTAATAC-<br>3'(AS)                                            |     |
| <i>Lpl</i> | Mouse | BC003305  | <u>5'-CTCITTATTGACTCTCTGCTGAA-3'(S)</u><br><u>5'-GGCTCTGACCTTATTGATCTC-3'(AS)</u> | 110 |
| <i>S29</i> | Mouse | NM_009093 | <u>5'-TTCCTTCTCCTCGTTGG-3'(S)</u><br><u>5'-ATGTTCAGCCCGTATTG-3'(AS)</u>           | 108 |

---

**S: sense; AS: antisense**

---
